# Supplementary material
Source: publisher figshare collection journal article supplement (https://acs.figshare.com/ndownloader/files/4032241)
Supplement: Supplementary file 1 [file 4032241]

Figure shows the UV-Vis spectra with the characteristic absorption peaks at 504, 472, and 446 nm. In addition, TLC analysis of extracted and commercial standard lycopene exhibited similar R<sub>f</sub> values in silica plates.

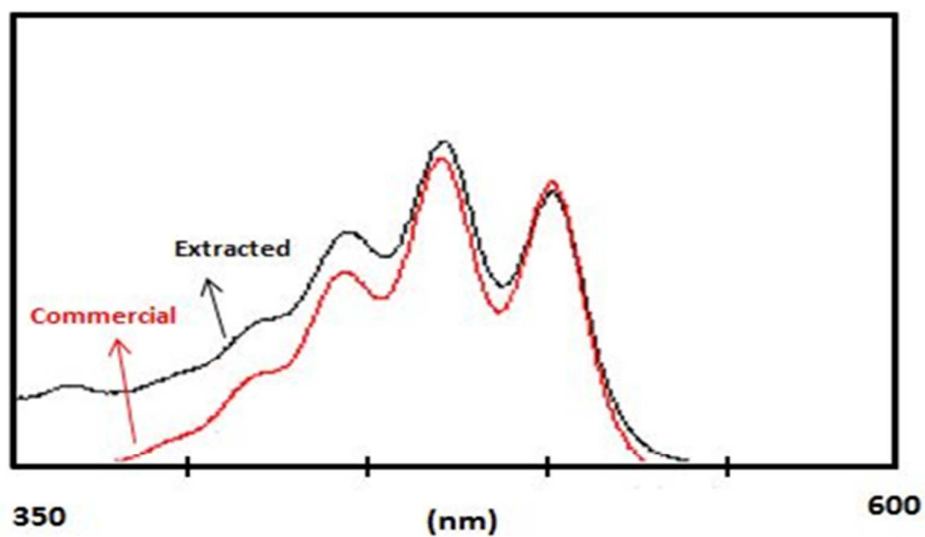

**Fig.1A-** UV-Vis spectra of lycopene extracted from tomato and commercially available lycopene.
